# Supplementary material for: Synthesis and structural evolution of dual-boron-source-modified polysilazane derived SiBCN ceramics
Source: Royal Society of Chemistry journal article supplement (doi:10.1039/c5nj03723a), 2016-01-01
Supplement: c5nj03723a1.pdf [file c5nj03723a1.pdf]

## Supporting Information for

### Synthesis and Structural Evolution of Dual-Boron-Source-Modified Polysilazanes Derived SiBCN Ceramics

Qian Zhang, Zhihua Yang,\* Dechang Jia,\* Qingqing Chen, Yu Zhou

Contents:

Fig. S1 X-ray diffraction (XRD) of the by-product of PBSN2,

Fig. S2 Thermogravimetric analysis of precursor polymers PSN, PBSN1 and PBSN2,

Fig. S3 TGA-QMS spectra of PSN,

Fig. S4 TGA-QMS spectra of PBSN1,

Fig. S5 TGA-DTG curves of liquid PBSN2 before thermal curing.

Fig. S6 Elemental XPS spectra of PBSN1 pyrolyzed at varied temperatures.

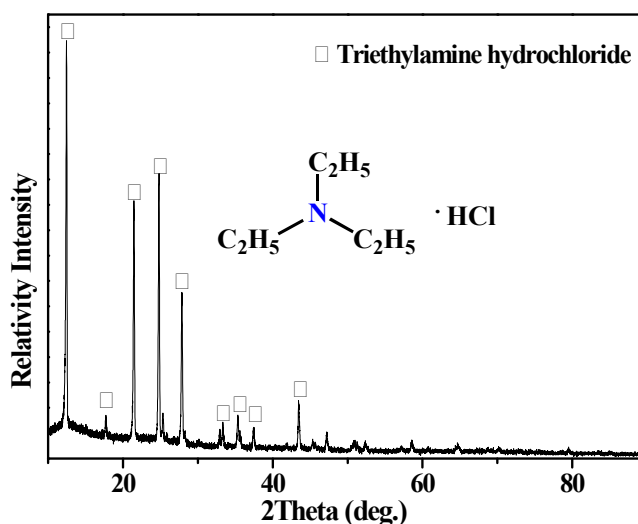

Fig. S1 X-ray diffraction (XRD) of the byproduct of PBSN2.

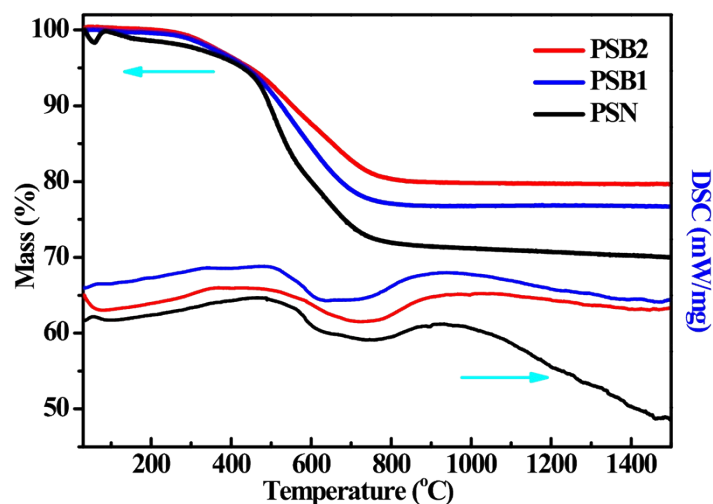

Fig. S2 Thermogravimetric analysis of precursor polymers PSN, PBSN1 and PBSN2. The temperature ranges of RT~1500 °C; heating rate: 10 °C min<sup>-1</sup>; Ar atmosphere.

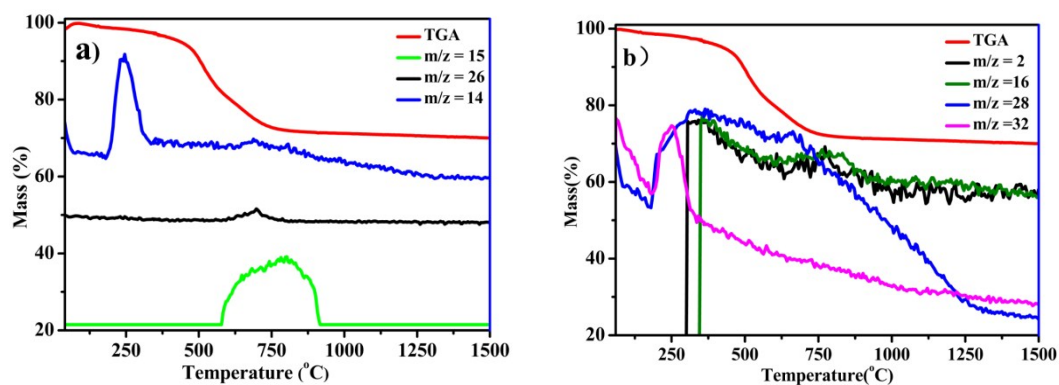

Fig. S3 TGA-QMS spectra of PSN showed the release of (a) CH<sub>3</sub>, C<sub>2</sub>H<sub>2</sub> and CH<sub>2</sub> fragments; (b) H<sub>2</sub>, CH<sub>4</sub>, C<sub>2</sub>H<sub>4</sub> and CH<sub>3</sub>NH<sub>3</sub> fragments. The temperature ranges of RT~1550 °C; heating rate: 10 °C min<sup>-1</sup>; Ar atmosphere.

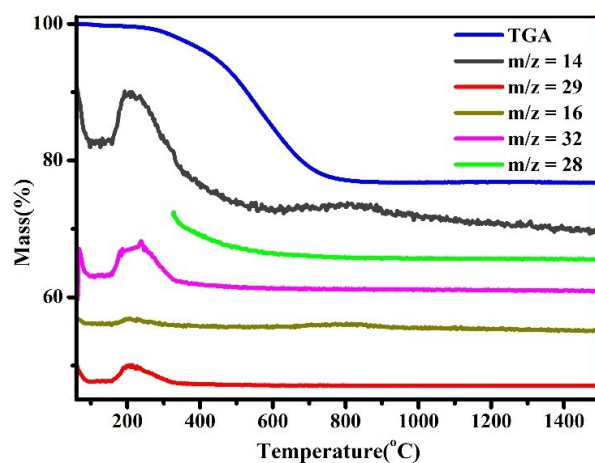

Fig. S4 TGA-QMS spectra of PBSN1 showed the release of CH<sub>2</sub>, C<sub>2</sub>H<sub>5</sub>, CH<sub>4</sub>, CH<sub>3</sub>NH<sub>3</sub> and C<sub>2</sub>H<sub>4</sub> fragments. The temperature ranges of RT~1550 °C; heating rate: 10 °C min<sup>-1</sup>; Ar atmosphere.

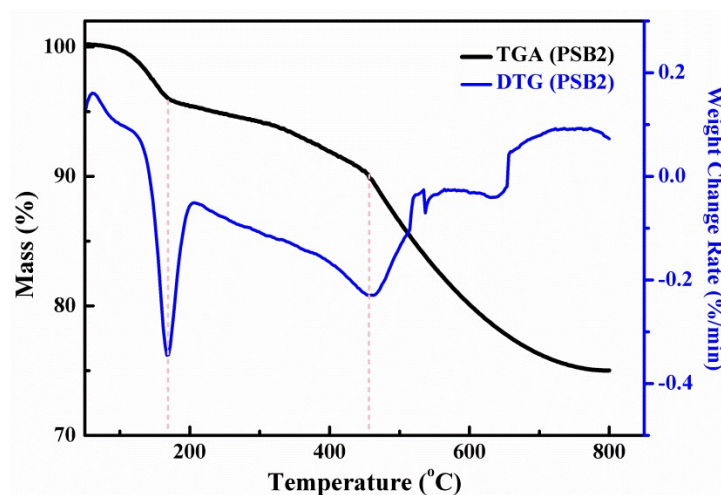

Fig. S5 TGA-DTG curves of liquid PBSN2 before thermal curing which decomposed in flowing Ar atmosphere. The temperature ranges of RT~800 °C; heating rate: 5 °C min<sup>-1</sup>. To make sure the cure point of PBSN2.

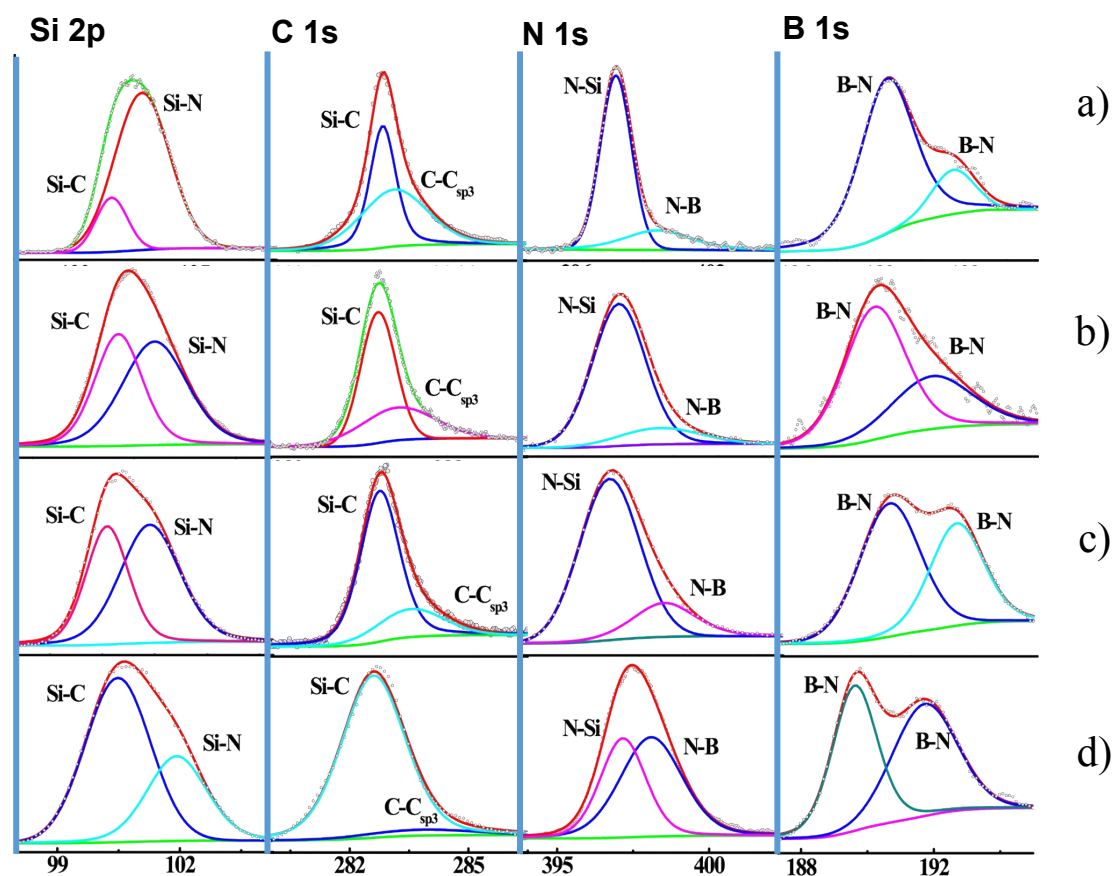

Fig. S6 Elemental XPS spectra of PBSN1 pyrolyzed at (a) 800 °C, (b) 1100 °C, (c) 1400 °C and (d) 1600 °C, respectively.
